# Supplementary material
Source: PubMed Central journal article supplement (PMC1976211)

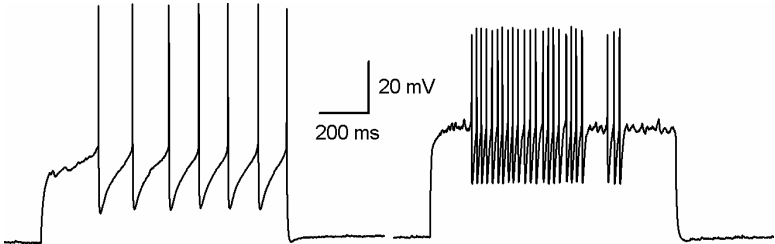

Supplement: pnas_0707204104_1.pdf [file pnas_0707204104_1.pdf]

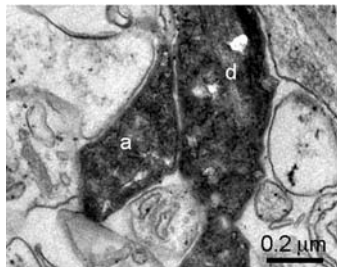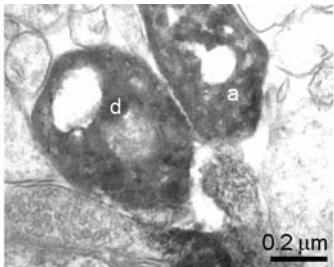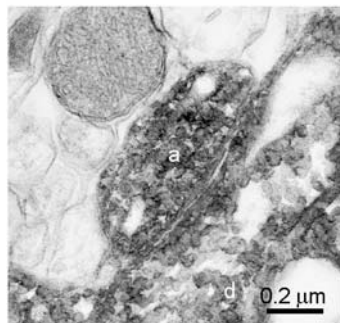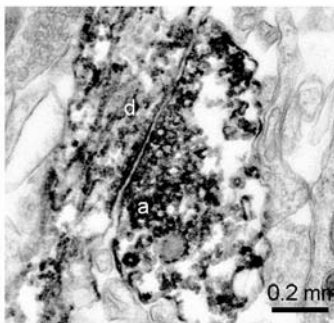

Supplement: pnas_0707204104_2.pdf [file pnas_0707204104_2.pdf]

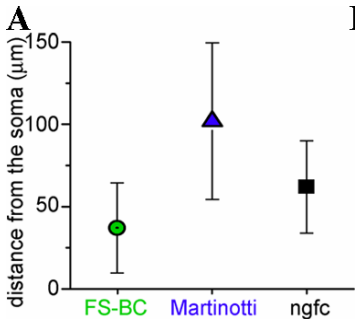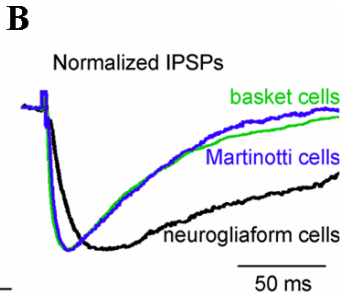

Supplement: pnas_0707204104_3.pdf [file pnas_0707204104_3.pdf]

fast-spiking basket cells at 21.5 °C

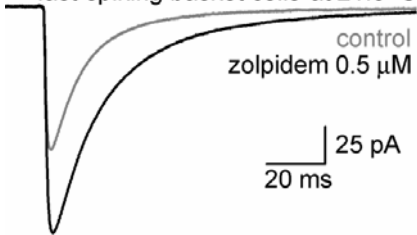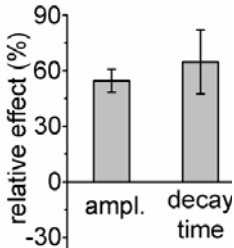

Supplement: pnas_0707204104_4.pdf [file pnas_0707204104_4.pdf]

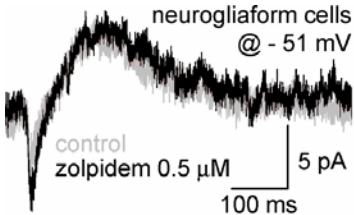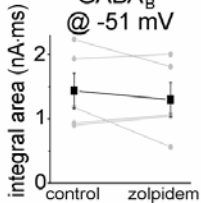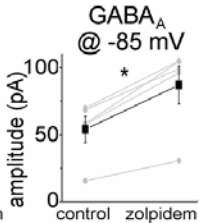

Supplement: pnas_0707204104_5.pdf [file pnas_0707204104_5.pdf]

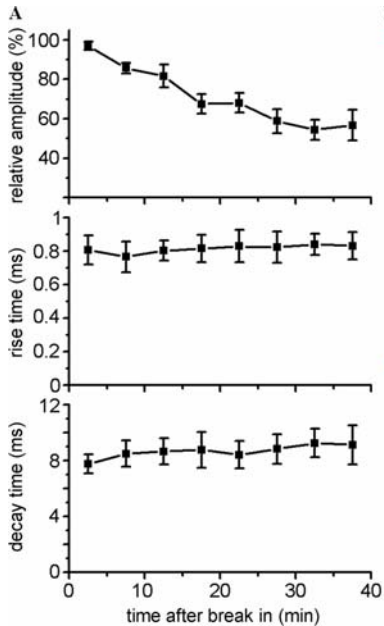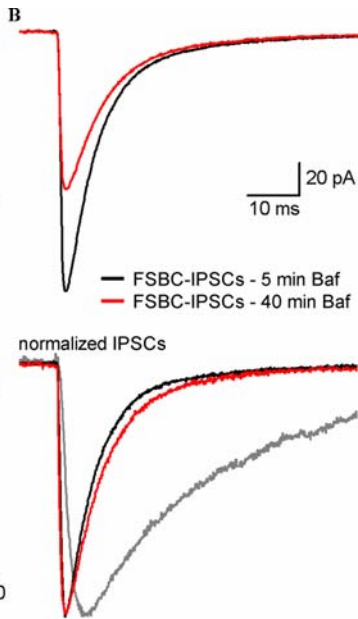

Supplement: pnas_0707204104_6.pdf [file pnas_0707204104_6.pdf]
